# Supplementary material for: Magnetic-responsive Pickering emulsion and its catalytic application at the water–oil interface
Source: Royal Society of Chemistry journal article supplement (doi:10.1039/d0nj05875k), 2021-01-01
Supplement: d0nj05875k1.pdf [file d0nj05875k1.pdf]

## Magnetic-responsible Pickering emulsion and its catalytic application at water–oil interface

Shenghua Ma<sup>#1,2</sup>, Wei Zong<sup>#1,3</sup>, Xiaojun Han<sup>\*1</sup>

<sup>1</sup> State Key Laboratory of Urban Water Resource and Environment School of Chemistry and Chemical Engineering, Harbin Institute of Technology, Harbin, 150001, China,

<sup>2</sup> Institute of Photonics & Photon-Technology, Northwest University, Xi'an, 710069, China

<sup>3</sup> College of Chemistry and Chemical Engineering, Qiqihar University, Qiqihar 161006, China

\* Corresponding authors.

E-mail addresses: hanxiaojun@hit.edu.cn

# These authors contributed equally to this work

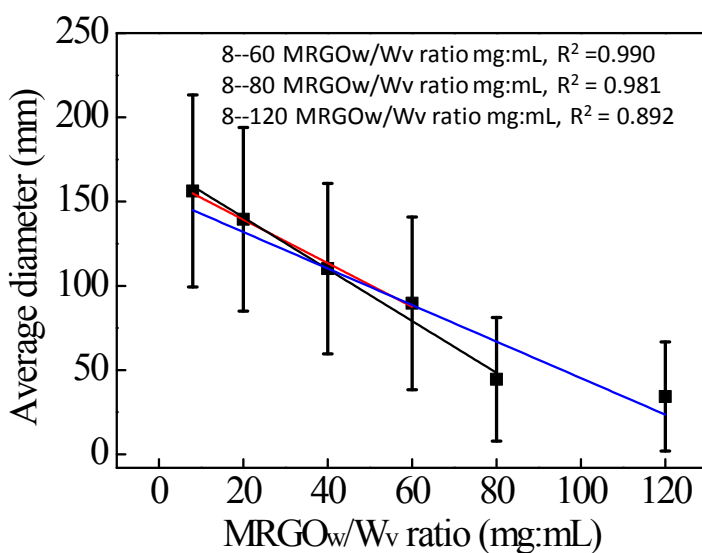

Fig.S1 The size of PE as a function of MRGO<sub>w</sub>/W<sub>v</sub> ratio

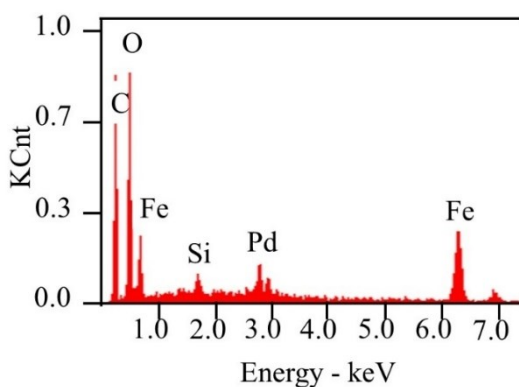

Fig.S2 The EDS spectroscopy spectrum of MRGO-Pd

Table S1 the reaction rate constant at various catalyst dosage

| Catalyst dosage<br>(g/L) | $k$<br>(min <sup>-1</sup> ) | $R^2$  |
|--------------------------|-----------------------------|--------|
| 0.16                     | 0.0057                      | 0.9830 |
| 0.4                      | 0.0113                      | 0.9986 |
| 0.8                      | 0.0165                      | 0.9755 |
| 1.2                      | 0.0542                      | 0.9971 |
| 1.6                      | 0.0909                      | 0.9944 |

Table S2 the reaction rate constant at various H<sub>2</sub>O<sub>2</sub> concentration

| H <sub>2</sub> O <sub>2</sub> concentration<br>(g/L) | $k$<br>(min <sup>-1</sup> ) | $R^2$  |
|------------------------------------------------------|-----------------------------|--------|
| 0.5                                                  | 0.0052                      | 0.9722 |
| 0.9                                                  | 0.0142                      | 0.9882 |
| 1.3                                                  | 0.0238                      | 0.9895 |
| 1.9                                                  | 0.0542                      | 0.9971 |
| 2.4                                                  | 0.0180                      | 0.9961 |

Table S3 the reaction rate constant at various sudan-4 concentration

| Sudan-4 concentration<br>(mM) | $k$<br>(min <sup>-1</sup> ) | $R^2$  |
|-------------------------------|-----------------------------|--------|
| 0.25                          | 0.0702                      | 0.9955 |
| 0.54                          | 0.0542                      | 0.9971 |
| 0.79                          | 0.022                       | 0.9839 |
| 1.63                          | 0.0115                      | 0.9780 |

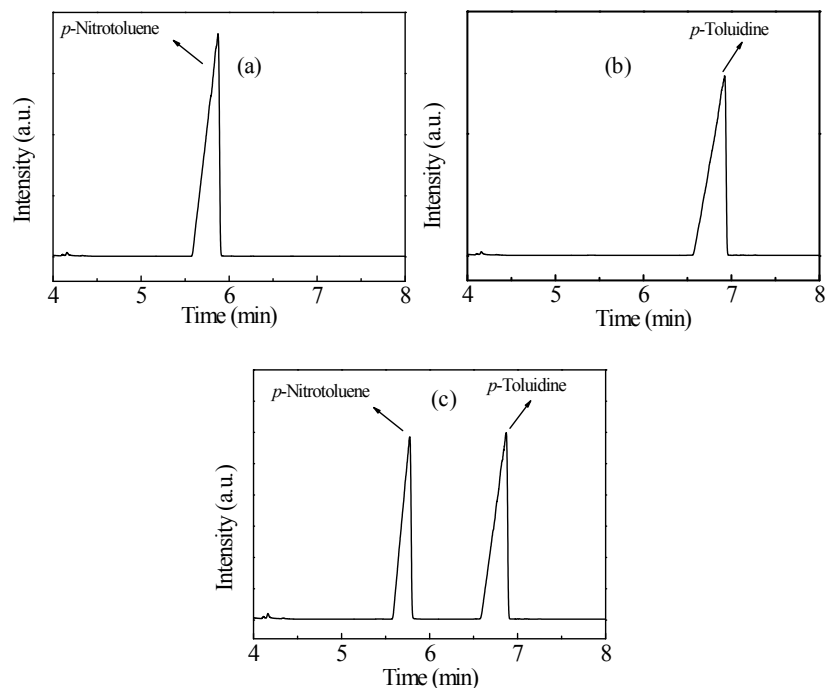

Fig.S3 Representative chromatograms of hydrogenation of *p*-nitrotoluene  
 (a) *p*-nitrotoluene; (b) *p*-toluidine; (c) Products during the hydrogenation of *p*-nitrotoluene  
 catalyzed by MRGO-Pd stabilized Pickering emulsions

Table S4 the reaction rate constant at various catalyst dosage

| catalyst dosage<br>(g/L) | $k$<br>( $\text{min}^{-1}$ ) | $R^2$  |
|--------------------------|------------------------------|--------|
| 0.6                      | 0.0249                       | 0.9674 |
| 1                        | 0.0386                       | 0.9631 |
| 2                        | 0.1963                       | 0.9945 |
| 3                        | 0.2668                       | 0.9765 |

Table S5 the reaction rate constant at various  $\text{NaBH}_4$  concentration

| $\text{NaBH}_4$ concentration<br>(g/L) | $k$<br>( $\text{min}^{-1}$ ) | $R^2$  |
|----------------------------------------|------------------------------|--------|
| 5                                      | 0.0230                       | 0.9833 |
| 10                                     | 0.0531                       | 0.9951 |
| 20                                     | 0.1963                       | 0.9945 |
| 40                                     | 0.2001                       | 0.9947 |
